# Supplementary material for: A Wireless Self-Fine-Tuning Artificial Neural Pathway Implant for Near-Real-Time Close-Loop Motor Modulation
Source: Research Square preprint supplement (doi:10.21203/rs.3.rs-6244028/v1), 2025-04-17
Supplement: Supplementary file 1 [file 417f4fd76f467daf238090a4.docx]

**Legends for Extended Data Figures**

**
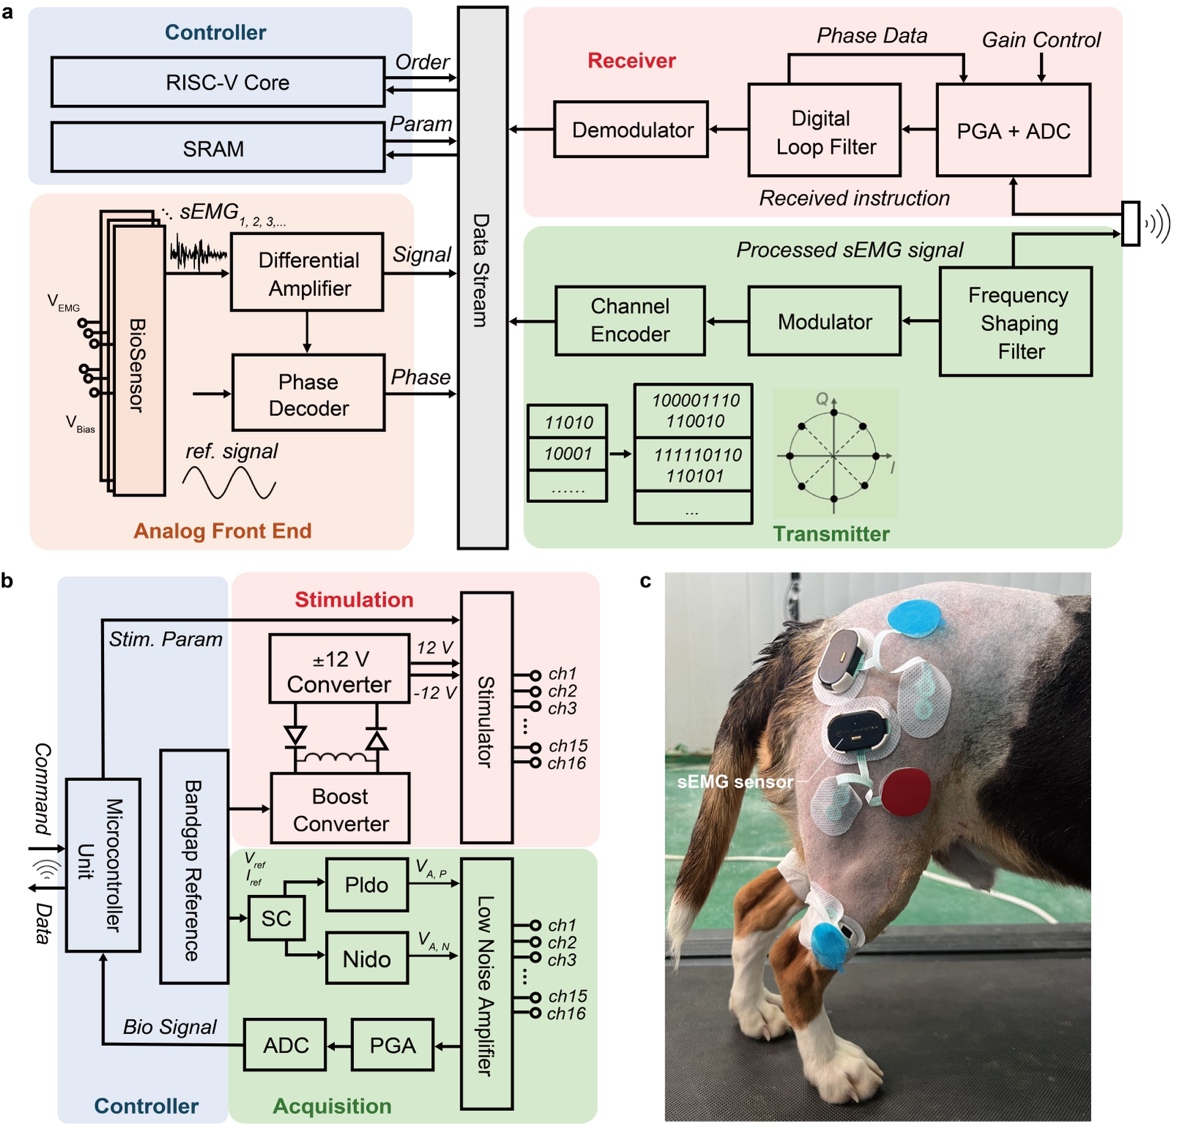
**

**Extended Data Fig. 1 Detailed schematic of self-fine-tuning artificial neural pathway.** **a,** Schematic of the surface electromyograph (sEMG) sensor. Controller receives commands from the server as well as acquires and sends sEMG signals; analog front-end collects the raw signals, performs differential amplification, and decodes phase; transmitter sends processed sEMG signals via Bluetooth; receiver demodulates instructions and stores parameters in the controller. **b,** Schematic of the neural interface. Controller part receives commands and sends neural signals from microcontroller unit and generates reference voltage and current from bandgap reference; stimulation part performes up to 16 channels of current stimulation; acquisition part recordes signals for up to 16 acquisition points and transmits the acquired signals to microcontroller unit after digital-to-analog conversion. **c,** Appearance of the sEMG sensor. Abbreviations: RISC-V, reduced instruction set computer V; Param, parameter; PGA, programmable gain amplifier; ADC, analog-to-digital converter; sEMG, surface electromyograph; Stim., stimulation; SC, switched capacitor; Pldo, positive low-dropout regulator; Nldo, negative low-dropout regulator.


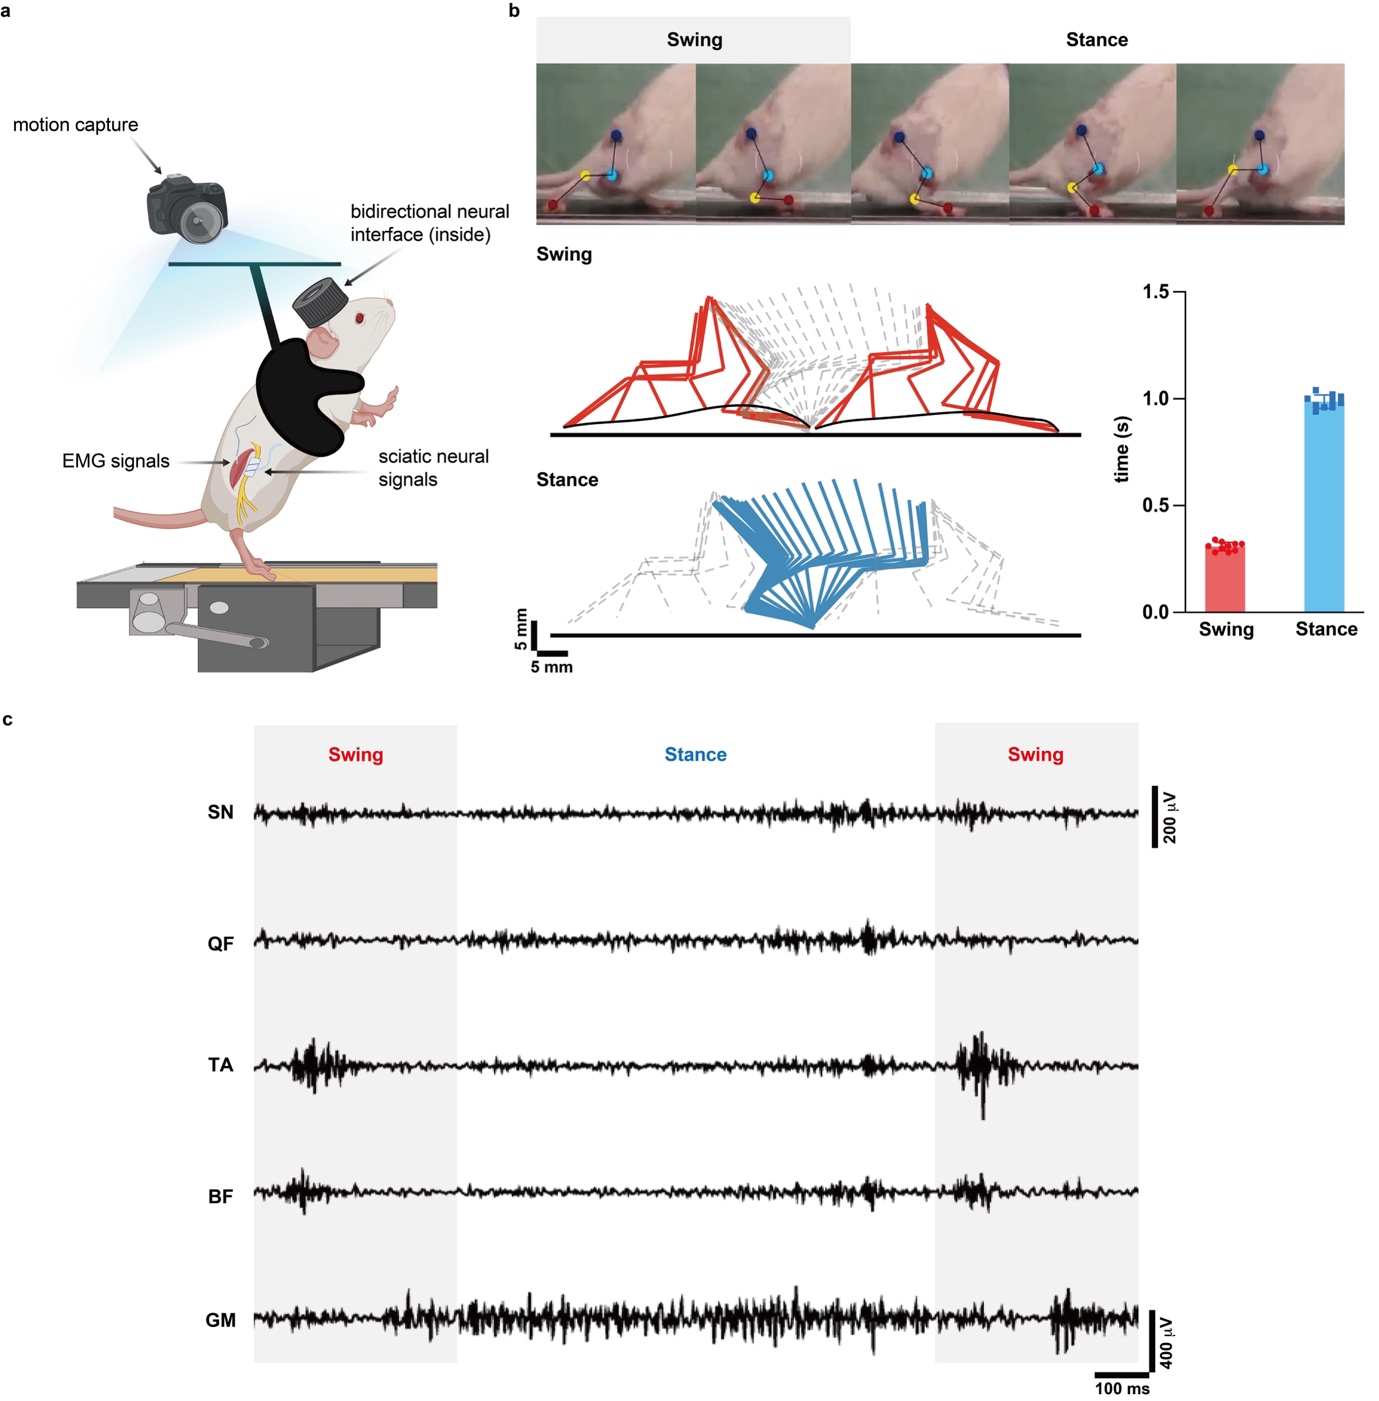


**Extended Data Fig. 2 Decoding motor laws of rat’s hindleg in healthy gait cycles.** **a,** Schematic diagram of the experimental platform, consisting of treadmill running at 0.144 km/h; camera capturing rat’s gait; chronic electromyograph (EMG) leads collecting hindleg EMG signals; and chronic cuff electrode recording sciatic neural signals. **b,** Motion capture and stick diagram. Red sticks indicate the swing phase; blue sticks indicate the stance phase; swing phase lasts 0.31 ± 0.02 s (*n* = 10 rats), and stance phase lasts 0.99 ± 0.03 s (*n* = 10 rats). **c,** Sciatic neural signals and EMG signals showing periodical changes consistent with gait cycles. Abbreviations: EMG, electromyography; SN, sciatic nerve; QF, quadriceps femoris; BF, biceps femoris; TA, tibialis anterior muscle; GM, gastrocnemius muscle. Illustration in **a** created using BioRender (https://biorender.com).


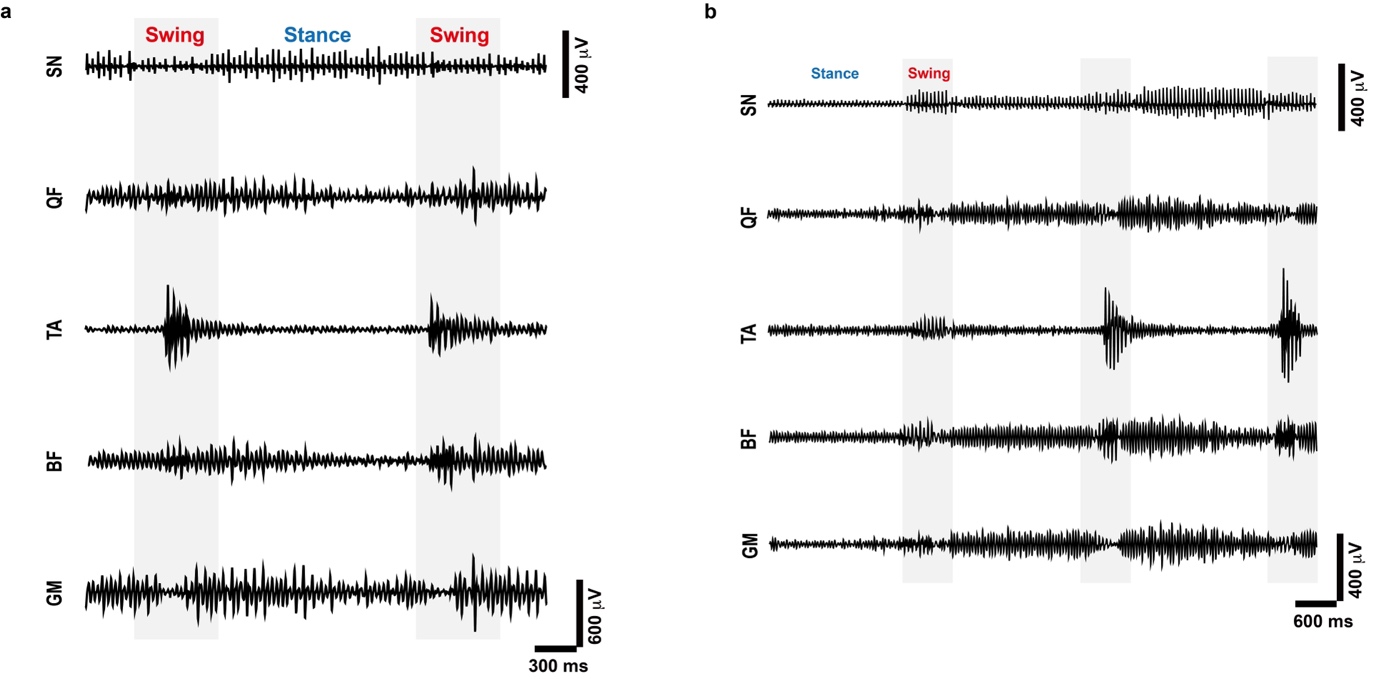


**Extended Data Fig. 3 Motor recovery by EES with self fine tuning on rat. a,** Meaningful surface electromyograph (sEMG) signals recorded immediately after EES is turned on. **b,** sEMG signals recorded with three-cycle self-fine-tuning feedback modulation. Abbreviations: SN, sciatic nerve; QF, quadriceps femoris; BF, biceps femoris; TA, tibialis anterior muscle; GM, gastrocnemius muscle.


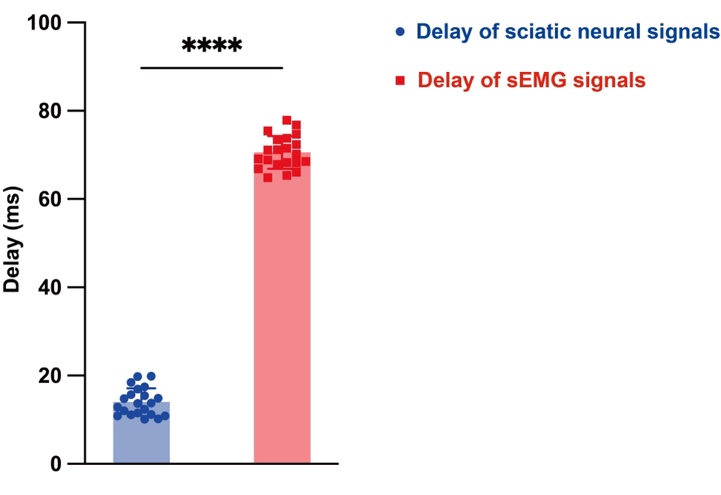


**Extended Data Fig. 4 Comparison of the delay between sciatic neural signals and sEMG signals.** Bar plot demonstrates a significantly shorter delay of sciatic neural signals in detecting the error than that of sEMG signals (*n* = 21 cycles: 3 cycles per beagle, 7 beagles totally). Abbreviation: sEMG, surface electromyograph. Two-tailed t-test; ****, *P* <0.001.


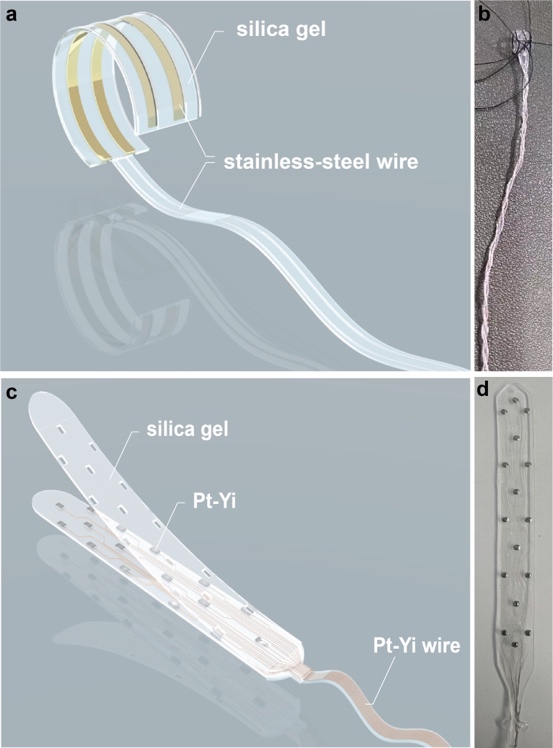


**Extended Data Fig. 5 Sciatic nerve cuff electrode and epidural electrode. a,** Diagram of a cuff electrode with a silica-gel base and stainless-steel wires. **b,** Image of the cuff electrode (for beagle) with a 4-mm diameter, 1 × 4 contacts, 500-mm wires, and prepared sutures. **c,** Diagram of an epidural electrode featuring a silica-gel base, Pt-Yi stimulating sites and wires, and a 16-electrode paddle array. **d,** Image of the epidural electrode measuring 8 mm in width and 104.7 mm in length.


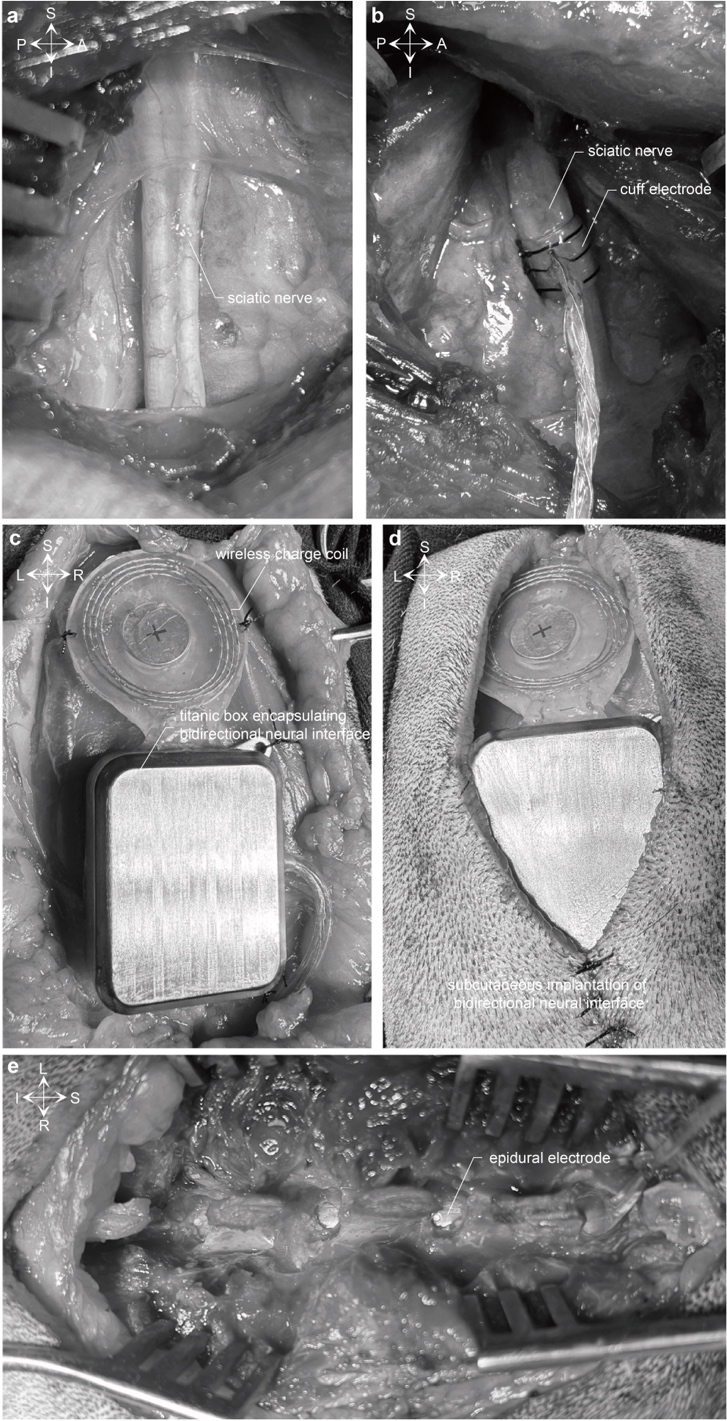


**Extended Data Fig. 6 Implants in beagle. a,** Anatomy of sciatic nerve. **b,** Chronic cuff electrode implanted to sciatic nerve. **c, d,** Bidirectional neural interface encapsulated in a titanic box implanted subcutaneously. **e,** Epidural electrode implanted in spinal canal.


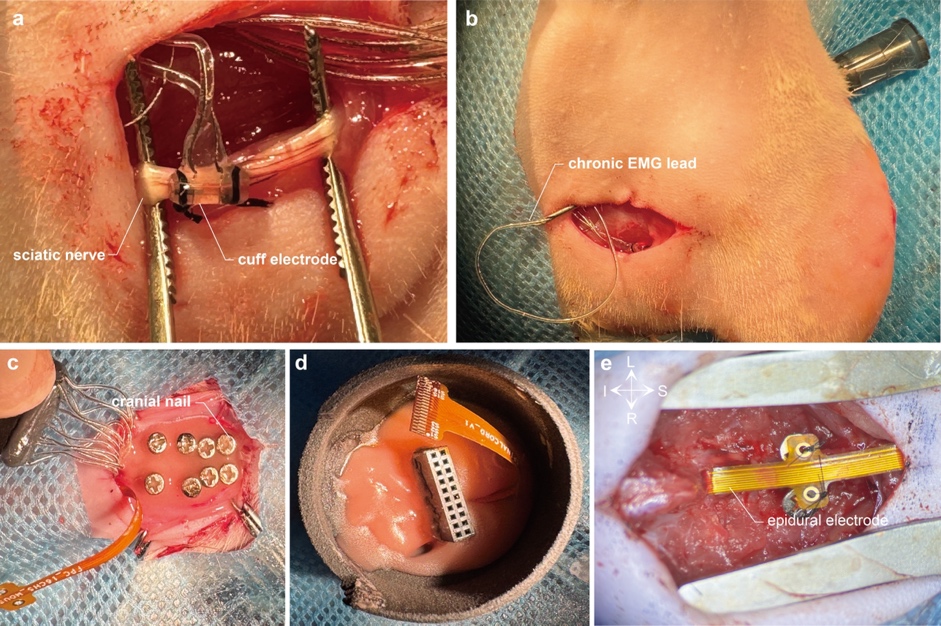


**Extended Data Fig. 7 Implants in rat. a,** Chronic cuff electrode implanted to sciatic nerve. **b,** Chronic electromyograph lead implanted into muscle. **c,** Cranial nails prepared on skull for fixing protective shell. **d,** Bidirectional neural interface fixed by dental cement in protective shell. **e,** Epidural electrode implanted in spinal canal. Abbreviation: EMG, electromyography.


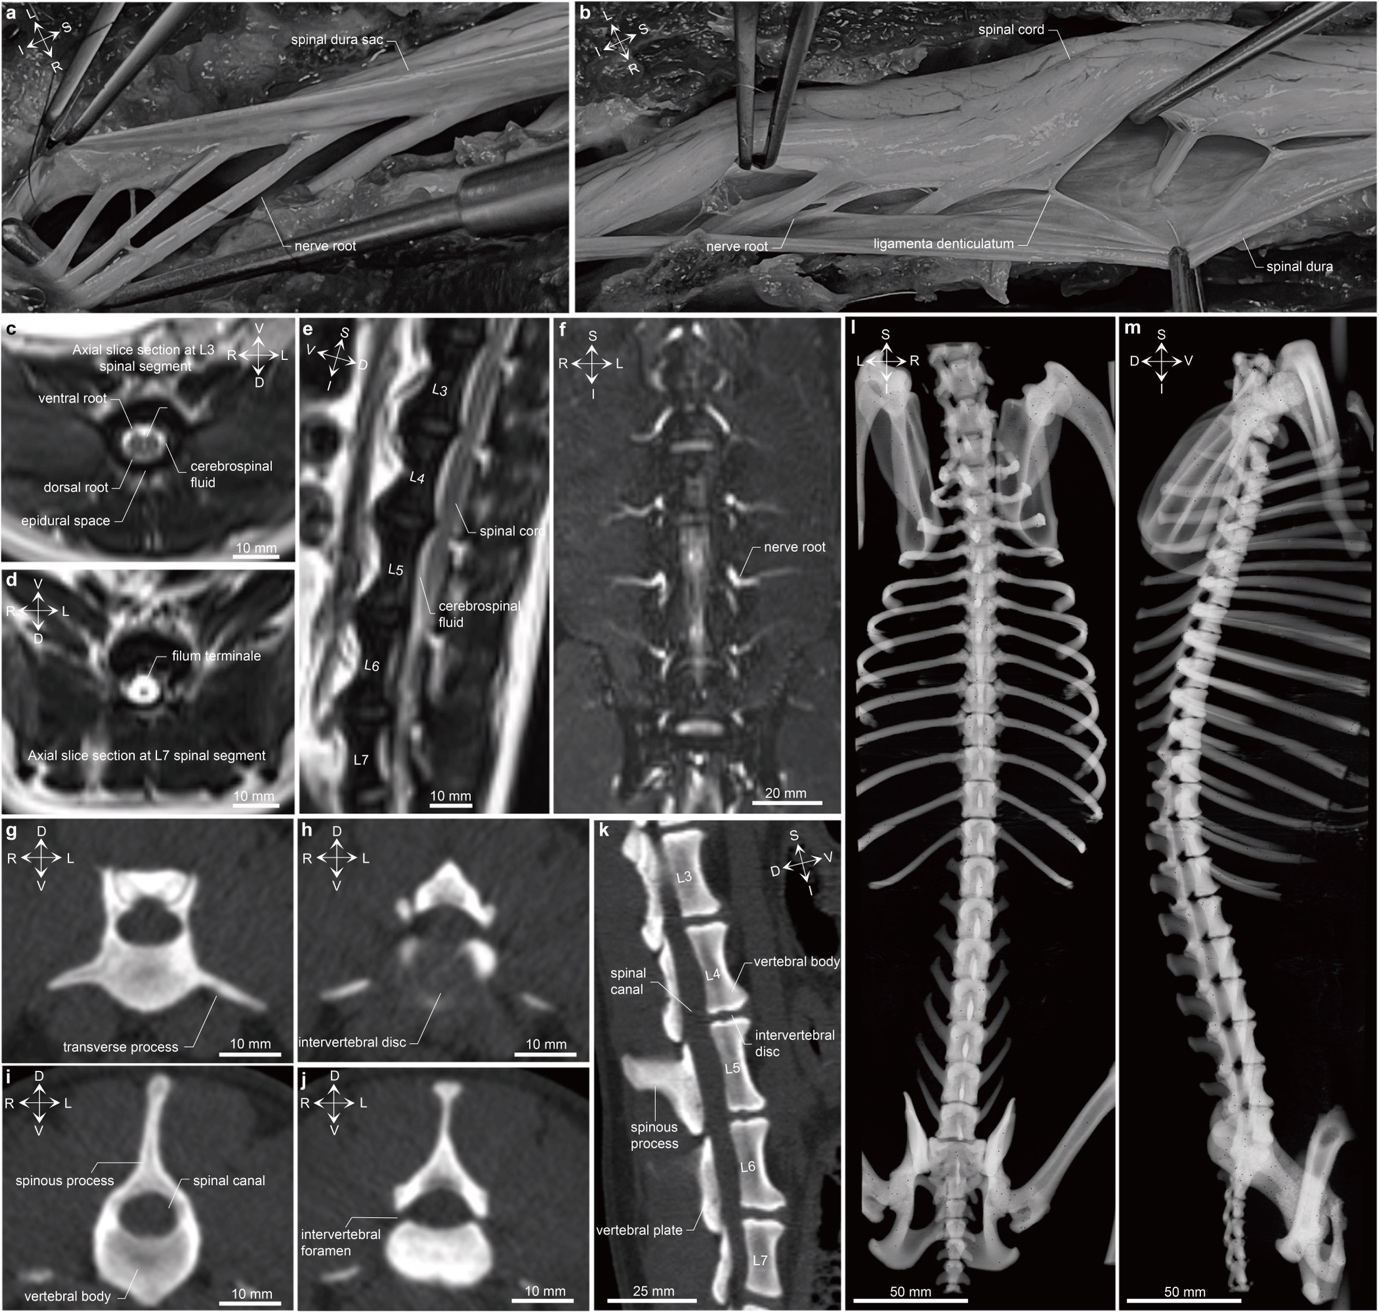


**Extended Data Fig. 8 Anatomy of beagle’s spinal cords and spine. a, b,** Autopsy of spinal cord and spinal nerves. **c–e,** Spinal T2-weighted sequencing of magnetic resonance imaging (**c, d,** axial view; **e,** sagittal view). **f,** Lumbosacral plexus nerve imaging, coronal view. **g–k,** Spinal computerized tomography (CT) scanning (**g–j,** axial view; **k,** sagittal view). **l, m,** Whole-spinal three-dimensional reconstruction of CT scanning (**l,** posterior view; **m,** lateral view).


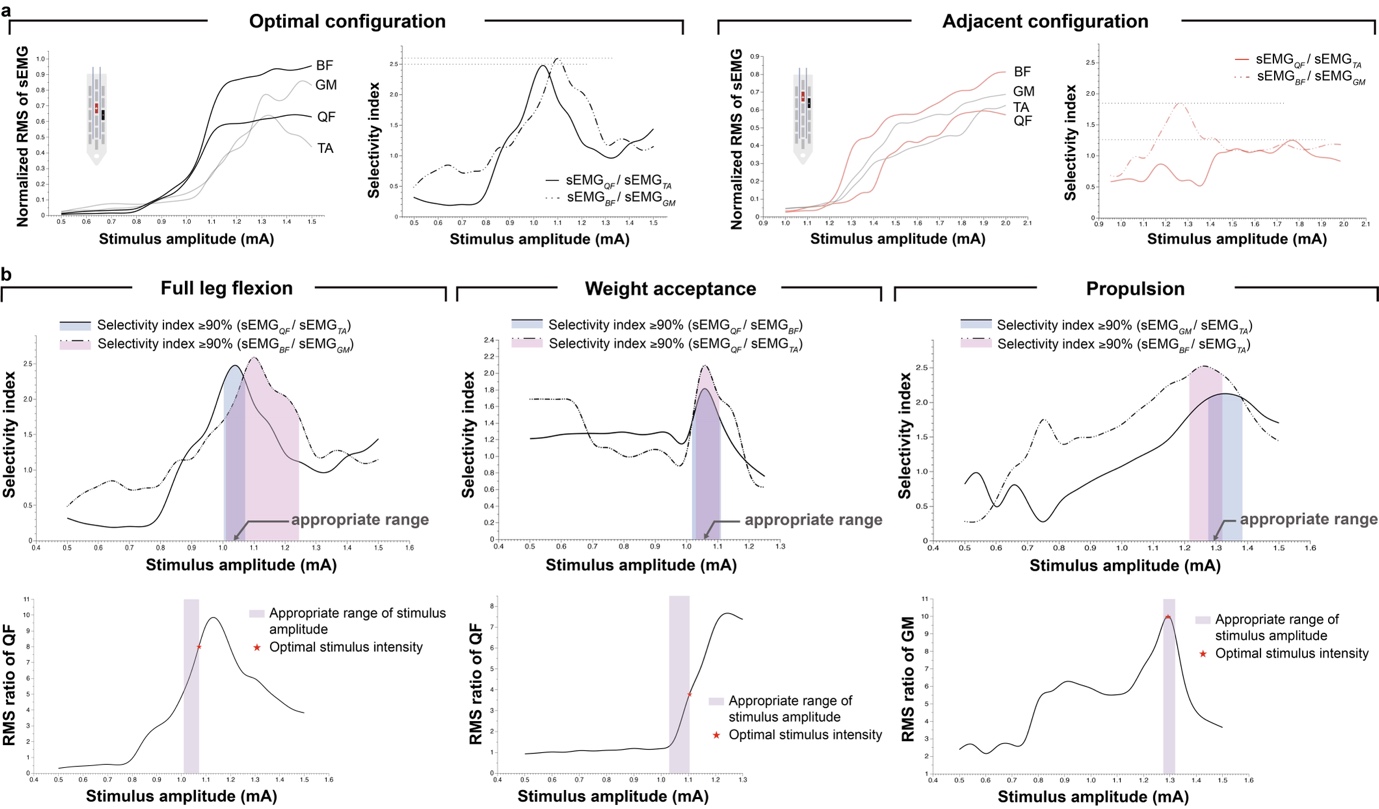


**Extended Data Fig. 9 Selection of stimulus patterns. a,** Selecting optimal configuration of cathode and anode (right full leg flexion). Selectivity index of adjacent configuration is remarkably lower than that of optimal one. **b,** Selecting optimal stimulus intensity (right hindleg). A current amplitude range with a selectivity index ≥90% is considered an appropriate stimulus intensity range. Within the appropriate range, the current amplitude that minimally activates contralateral muscles is regarded as the optimal stimulus intensity. Abbreviations: RMS, root mean square; sEMG, surface electromyography; QF, quadriceps femoris; BF, biceps femoris; TA, tibialis anterior muscle; GM, gastrocnemius muscle. Illustrations in **a** created using BioRender (https://biorender.com).
